# Supplementary material for: Relationships between body composition, anthropometrics, and standard lipid panels in a normative population
Source: PubMed Central journal article supplement (PMC10731366; doi:10.3389/fcvm.2023.1280179), 2023-12-06
Supplement: Datasheet1.pdf [file Datasheet1.pdf]

## Supplemental Materials

**Supplemental Table. 1 Comparison of Effects**

| Variable of Interest | Dependant Variable      | Unadjusted Estimate | Adjusted Estimate | Percent Change |
|----------------------|-------------------------|---------------------|-------------------|----------------|
| Waist-to-Hip Ratio   | HDL Levels              | -74.92              | -49.32            | 34.17          |
| Waist-to-Hip Ratio   | Triglyceride Levels     | 278.4               | 249.11            | 10.52          |
| Waist-to-Hip Ratio   | VLDL Cholesterol Levels | 55.71               | 49.39             | 11.33          |
| Visceral Fat Levels  | Triglyceride Levels     | 3.18                | 3.75              | -17.96         |
| Visceral Fat Levels  | VLDL Cholesterol Levels | 0.64                | 0.75              | -17.68         |
| Visceral Fat Levels  | Cholesterol Levels      | 1.42                | 1.34              | 5.19           |
| Visceral Fat Levels  | LDL Levels              | 1.21                | 1.22              | -1.38          |
| Body Fat Percentage  | Cholesterol Levels      | 0.63                | 0.78              | -24.41         |
| Body Fat Percentage  | Triglyceride Levels     | 1.01                | 2.13              | -109.79        |
| Body Fat Percentage  | VLDL Cholesterol Levels | 0.2                 | 0.43              | -110.07        |
| Body Fat Percentage  | LDL Levels              | 0.41                | 0.7               | -71.36         |
| Visceral Fat Levels  | HDL Levels              | -0.42               | -0.62             | -49.58         |
| Body Fat Percentage  | HDL Levels              | 0.02                | -0.34             | 1615.94        |

**Gives values for the associations before and after adjustment with the model and their respective percent changes. Insignificant percent changes are indicated in red.**
